# Supplementary material
Source: PubMed Central journal article supplement (PMC7461152)
Supplement: 216_2020_2918_MOESM1_ESM.pdf [file 216_2020_2918_MOESM1_ESM.pdf]

## **Analytical and Bioanalytical Chemistry**

### **Electronic Supplementary Material**

#### **3,3',5,5'-tetramethylbenzidine as multi-colorimetric indicator of chlorine in water in line with health guideline values**

Pasquale Palladino, Francesca Torrini, Simona Scarano, Maria Minunni

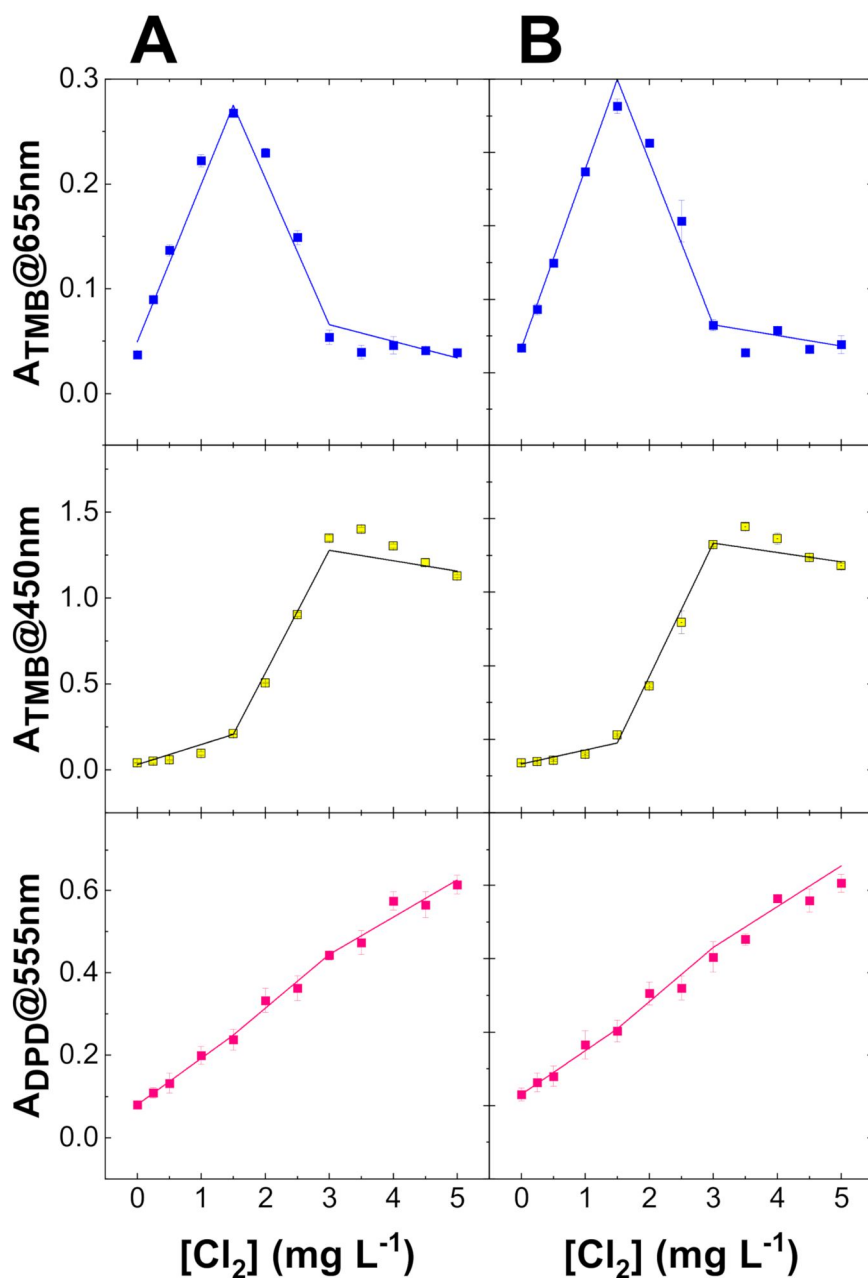

**Fig. S1** Piecewise linear fitting for TMB and DPD titration experiments with chlorine in H<sub>2</sub>O (A) and tap water (B) at  $t = 0$  s. Data and fitting parameters are reported in the main text in Figure 4 and Table 3, respectively. The chlorine concentration ranges are 0.00-1.50 mg L<sup>-1</sup>, 1.50-3.00 mg L<sup>-1</sup>, and 3.00-5.00 mg L<sup>-1</sup>

**Table S1** Effect of several ions and molecules on colorimetric determination of chlorine in water samples by TMB methods

| Ion or Molecule added                                                                     | Tolerance limit <sup>a</sup><br>[21, 22] | Interference <sup>b</sup><br>[23]            | Interference <sup>c</sup><br>[24] |
|-------------------------------------------------------------------------------------------|------------------------------------------|----------------------------------------------|-----------------------------------|
| Sulfate                                                                                   | 10000                                    | +0.2 %                                       | Negligible                        |
| Chloride                                                                                  | 10000                                    | -0.2 %                                       | Negligible                        |
| Ca(II)                                                                                    | 2000                                     | +0.5 %                                       | Negligible                        |
| Mg(II)                                                                                    | 2000                                     | -4.5 % as Mg(NO <sub>3</sub> ) <sub>2</sub>  | Negligible                        |
| Nitrate                                                                                   | 2000                                     | -2.9 % as NO <sub>3</sub> <sup>-</sup>       | n.d.                              |
| Fe(III) <sup>d</sup>                                                                      | 50                                       | +0.4 % for Fe(NO <sub>3</sub> ) <sub>3</sub> | Negligible                        |
| Zn(II)                                                                                    | 50                                       | n.d.                                         | Negligible                        |
| Cu(II)                                                                                    | 50                                       | -3.7 %                                       | n.d.                              |
| Ni(II)                                                                                    | 50                                       | +2.3 %                                       | n.d.                              |
| Pb(II)                                                                                    | 50                                       | +2.9 %                                       | n.d.                              |
| Al(III)                                                                                   | 50                                       | -3.3 %                                       | n.d.                              |
| Mn(II); Co(II); As(V); Mo(VI)                                                             | 50                                       | n.d.                                         | n.d.                              |
| MnO <sub>4</sub> <sup>-</sup>                                                             | n.d.                                     | -1.7 %                                       | n.d.                              |
| Hg(II)                                                                                    | 10                                       | -2.9 %                                       | n.d.                              |
| Se(IV)                                                                                    | 10                                       | n.d.                                         | n.d.                              |
| W(VI)                                                                                     | 10                                       | n.d.                                         | n.d.                              |
| MnO <sub>2</sub>                                                                          | 5                                        | n.d.                                         | n.d.                              |
| Cr(III)                                                                                   | 2                                        | n.d.                                         | n.d.                              |
| Cr(VI)                                                                                    | 1                                        | +4.9 %                                       | n.d.                              |
| V(V)                                                                                      | 1                                        | n.d.                                         | n.d.                              |
| Ozone                                                                                     | 0.2                                      | n.d.                                         | n.d.                              |
| Iodide; Potassium                                                                         | n.d.                                     | n.d.                                         | Negligible                        |
| Carbonate                                                                                 | n.d.                                     | -2.3 % for HCO <sub>3</sub> <sup>-</sup>     | Negligible                        |
| H <sub>2</sub> PO <sub>4</sub> <sup>-d</sup>                                              | n.d.                                     | Buffer component                             | Negligible                        |
| P <sub>2</sub> O <sub>7</sub> <sup>4-d</sup> ; H <sub>2</sub> O <sub>2</sub> <sup>e</sup> | n.d.                                     | n.d.                                         | Negligible                        |

<sup>a</sup>Interferent/Chlorine (m/m) limit for interference. Chlorine 0.4 mg L<sup>-1</sup>; pH 1.8  
<sup>b</sup>Interferent representative of the worst-case scenario. Chlorine 0.7 mg L<sup>-1</sup>; pH acid  
<sup>c</sup>Interferent at 0.2 mM. Chlorine 0.02 mM (1.4 mg L<sup>-1</sup>); pH 4.0.  
<sup>d</sup>Phosphate salts in buffer confer high tolerance to TMB solutions toward Fe(III)  
<sup>e</sup>TMB requires the presence of peroxidases for efficient oxidation by H<sub>2</sub>O<sub>2</sub> [15].  
 Percentage represents the signal interference when compared to the same standard without interfering agent. The interference is considered negligible when the signal difference is below 5 % within the error. n.d. (not determined).

**Table S2.1** Coefficient of variation (%CV) for Absorbance values at 280 nm vs  $[Cl_2]$  and time from Figure 2B

| Time (s)                                | $[Cl_2]$ mg L <sup>-1</sup> in H <sub>2</sub> O |                      |                      |                      |                      |                      |
|-----------------------------------------|-------------------------------------------------|----------------------|----------------------|----------------------|----------------------|----------------------|
|                                         | 0.00                                            | 1.00                 | 2.00                 | 3.00                 | 4.00                 | 5.00                 |
|                                         | %CV <sub>280nm</sub>                            | %CV <sub>280nm</sub> | %CV <sub>280nm</sub> | %CV <sub>280nm</sub> | %CV <sub>280nm</sub> | %CV <sub>280nm</sub> |
| 0                                       | 0.92                                            | 1.00                 | 6.02                 | 14.53                | 1.44                 | 6.17                 |
| 12                                      | 1.00                                            | 1.04                 | 5.90                 | 15.54                | 3.42                 | 7.01                 |
| 22                                      | 0.97                                            | 1.05                 | 5.73                 | 15.06                | 5.16                 | 5.23                 |
| 32                                      | 1.00                                            | 1.02                 | 6.01                 | 14.96                | 7.94                 | 4.89                 |
| 42                                      | 1.03                                            | 1.06                 | 6.06                 | 14.87                | 10.00                | 1.70                 |
| 52                                      | 1.06                                            | 1.05                 | 5.77                 | 14.68                | 9.85                 | 4.10                 |
| 62                                      | 1.05                                            | 1.09                 | 5.89                 | 11.29                | 10.04                | 4.44                 |
| 72                                      | 1.03                                            | 1.36                 | 5.96                 | 14.70                | 9.22                 | 3.64                 |
| 82                                      | 1.05                                            | 1.06                 | 6.21                 | 14.63                | 9.17                 | 7.47                 |
| 92                                      | 1.09                                            | 0.78                 | 5.79                 | 14.84                | 10.60                | 3.84                 |
| 102                                     | 1.11                                            | 1.08                 | 5.73                 | 14.81                | 10.27                | 3.05                 |
| 112                                     | 1.06                                            | 1.10                 | 5.24                 | 16.72                | 9.43                 | 3.46                 |
| 122                                     | 1.13                                            | 1.04                 | 5.41                 | 14.26                | 0.79                 | 2.56                 |
| 132                                     | 1.13                                            | 1.09                 | 5.56                 | 14.20                | 11.19                | 3.24                 |
| 142                                     | 1.15                                            | 0.96                 | 6.32                 | 13.85                | 11.06                | 3.48                 |
| 152                                     | 1.16                                            | 1.62                 | 8.65                 | 14.26                | 11.54                | 2.02                 |
| 162                                     | 1.19                                            | 1.15                 | 6.67                 | 14.11                | 9.28                 | 3.19                 |
| 172                                     | 1.18                                            | 1.22                 | 5.31                 | 13.97                | 9.18                 | 3.22                 |
| 182                                     | 1.15                                            | 1.21                 | 5.38                 | 14.20                | 9.74                 | 3.01                 |
| 192                                     | 1.17                                            | 1.14                 | 5.47                 | 11.55                | 9.63                 | 2.62                 |
| 202                                     | 1.18                                            | 1.22                 | 5.47                 | 13.89                | 10.01                | 2.90                 |
| 212                                     | 1.19                                            | 1.16                 | 5.40                 | 13.55                | 9.50                 | 3.34                 |
| 222                                     | 1.15                                            | 1.16                 | 5.24                 | 13.52                | 10.62                | 3.25                 |
| 232                                     | 1.20                                            | 1.09                 | 5.29                 | 13.85                | 9.68                 | 3.16                 |
| 242                                     | 1.22                                            | 1.20                 | 6.11                 | 13.47                | 9.79                 | 1.99                 |
| 252                                     | 1.22                                            | 1.21                 | 5.06                 | 13.58                | 9.02                 | 3.84                 |
| 262                                     | 1.23                                            | 1.11                 | 5.05                 | 13.78                | 9.08                 | 3.66                 |
| 272                                     | 1.30                                            | 1.01                 | 5.04                 | 13.62                | 8.55                 | 3.95                 |
| 282                                     | 1.27                                            | 1.06                 | 5.01                 | 13.69                | 8.87                 | 3.31                 |
| 292                                     | 1.25                                            | 1.06                 | 5.02                 | 13.94                | 9.12                 | 3.10                 |
| 302                                     | 1.24                                            | 0.97                 | 5.06                 | 14.25                | 8.94                 | 2.66                 |
| <b>%CV<sub>mean</sub><br/>(0-300 s)</b> | 1.13                                            | 1.11                 | 5.70                 | 14.13                | 8.78                 | 3.66                 |

**Table S2.2** Coefficient of variation (%CV) for Absorbance values at 450 nm vs [Cl<sub>2</sub>] and time from Figure 2B

| Time (s)                                | [Cl <sub>2</sub> ] mg L <sup>-1</sup> in H <sub>2</sub> O |                      |                      |                      |                      |                      |
|-----------------------------------------|-----------------------------------------------------------|----------------------|----------------------|----------------------|----------------------|----------------------|
|                                         | 0.00                                                      | 1.00                 | 2.00                 | 3.00                 | 4.00                 | 5.00                 |
|                                         | %CV <sub>450nm</sub>                                      | %CV <sub>450nm</sub> | %CV <sub>450nm</sub> | %CV <sub>450nm</sub> | %CV <sub>450nm</sub> | %CV <sub>450nm</sub> |
| 0                                       | 4.89                                                      | 9.58                 | 2.86                 | 3.35                 | 1.00                 | 0.54                 |
| 12                                      | 3.07                                                      | 7.66                 | 2.86                 | 5.16                 | 0.99                 | 0.34                 |
| 22                                      | 4.78                                                      | 15.69                | 2.24                 | 2.92                 | 0.59                 | 0.28                 |
| 32                                      | 5.44                                                      | 13.35                | 2.02                 | 2.92                 | 0.16                 | 0.26                 |
| 42                                      | 5.63                                                      | 14.97                | 1.53                 | 2.79                 | 0.65                 | 0.20                 |
| 52                                      | 13.07                                                     | 14.92                | 1.42                 | 2.79                 | 0.90                 | 0.19                 |
| 62                                      | 10.51                                                     | 14.06                | 1.31                 | 2.83                 | 1.33                 | 0.18                 |
| 72                                      | 6.58                                                      | 13.61                | 1.31                 | 2.75                 | 1.27                 | 0.18                 |
| 82                                      | 2.25                                                      | 8.36                 | 1.20                 | 2.77                 | 1.43                 | 0.17                 |
| 92                                      | 9.88                                                      | 13.77                | 0.70                 | 2.77                 | 1.41                 | 0.10                 |
| 102                                     | 5.27                                                      | 15.56                | 1.25                 | 2.79                 | 1.21                 | 0.18                 |
| 112                                     | 2.86                                                      | 13.05                | 1.26                 | 2.77                 | 1.28                 | 0.18                 |
| 122                                     | 9.81                                                      | 12.95                | 1.64                 | 2.72                 | 1.37                 | 0.24                 |
| 132                                     | 1.63                                                      | 13.16                | 1.26                 | 2.80                 | 1.36                 | 0.18                 |
| 142                                     | 7.58                                                      | 13.31                | 1.10                 | 2.79                 | 1.18                 | 0.16                 |
| 152                                     | 14.42                                                     | 13.99                | 0.73                 | 2.75                 | 1.32                 | 0.11                 |
| 162                                     | 10.35                                                     | 9.24                 | 0.33                 | 2.75                 | 1.32                 | 0.05                 |
| 172                                     | 0.27                                                      | 12.19                | 0.61                 | 2.71                 | 1.34                 | 0.09                 |
| 182                                     | 8.97                                                      | 12.06                | 1.20                 | 2.72                 | 1.35                 | 0.18                 |
| 192                                     | 1.56                                                      | 11.62                | 1.18                 | 2.78                 | 1.40                 | 0.18                 |
| 202                                     | 2.59                                                      | 12.09                | 1.11                 | 2.77                 | 1.16                 | 0.26                 |
| 212                                     | 2.71                                                      | 12.23                | 1.11                 | 2.73                 | 1.30                 | 0.39                 |
| 222                                     | 3.75                                                      | 12.09                | 1.14                 | 2.75                 | 1.27                 | 0.17                 |
| 232                                     | 0.55                                                      | 11.76                | 1.18                 | 2.67                 | 1.24                 | 0.18                 |
| 242                                     | 12.90                                                     | 12.37                | 1.04                 | 2.66                 | 1.32                 | 0.16                 |
| 252                                     | 3.72                                                      | 11.54                | 0.66                 | 2.72                 | 1.35                 | 0.10                 |
| 262                                     | 4.36                                                      | 11.86                | 1.13                 | 2.69                 | 1.35                 | 0.17                 |
| 272                                     | 9.40                                                      | 12.66                | 1.18                 | 2.67                 | 1.29                 | 0.18                 |
| 282                                     | 9.13                                                      | 13.32                | 1.18                 | 2.69                 | 1.35                 | 0.18                 |
| 292                                     | 1.56                                                      | 12.93                | 1.16                 | 2.67                 | 1.27                 | 0.33                 |
| 302                                     | 1.35                                                      | 13.48                | 1.23                 | 2.71                 | 1.35                 | 0.19                 |
| <b>%CV<sub>mean</sub><br/>(0-300 s)</b> | 5.83                                                      | 12.56                | 1.29                 | 2.85                 | 1.20                 | 0.20                 |

**Table S2.3** Coefficient of variation (%CV) for Absorbance values at 655 nm vs  $[Cl_2]$  and time from Figure 2B

| Time (s)                                | $[Cl_2]$ mg L <sup>-1</sup> in H <sub>2</sub> O |                      |                      |                      |                      |                      |
|-----------------------------------------|-------------------------------------------------|----------------------|----------------------|----------------------|----------------------|----------------------|
|                                         | 0.00                                            | 1.00                 | 2.00                 | 3.00                 | 4.00                 | 5.00                 |
|                                         | %CV <sub>655nm</sub>                            | %CV <sub>655nm</sub> | %CV <sub>655nm</sub> | %CV <sub>655nm</sub> | %CV <sub>655nm</sub> | %CV <sub>655nm</sub> |
| 0                                       | 1.55                                            | 8.08                 | 1.06                 | 1.91                 | 3.39                 | 10.32                |
| 12                                      | 8.72                                            | 8.23                 | 0.99                 | 1.79                 | 6.24                 | 5.58                 |
| 22                                      | 1.66                                            | 8.28                 | 0.86                 | 1.55                 | 6.38                 | 4.78                 |
| 32                                      | 1.77                                            | 8.12                 | 0.78                 | 1.40                 | 6.06                 | 2.69                 |
| 42                                      | 2.20                                            | 7.98                 | 0.63                 | 1.12                 | 6.04                 | 2.81                 |
| 52                                      | 6.13                                            | 8.24                 | 0.67                 | 1.21                 | 5.88                 | 5.88                 |
| 62                                      | 3.91                                            | 8.58                 | 0.54                 | 0.97                 | 7.09                 | 5.09                 |
| 72                                      | 3.21                                            | 6.83                 | 0.50                 | 0.89                 | 6.94                 | 3.02                 |
| 82                                      | 9.05                                            | 8.07                 | 0.52                 | 0.92                 | 7.60                 | 1.89                 |
| 92                                      | 3.88                                            | 8.70                 | 0.69                 | 1.23                 | 7.77                 | 2.49                 |
| 102                                     | 2.26                                            | 8.33                 | 0.66                 | 1.18                 | 8.13                 | 7.49                 |
| 112                                     | 1.96                                            | 8.08                 | 0.53                 | 0.94                 | 8.98                 | 12.79                |
| 122                                     | 4.55                                            | 8.47                 | 0.56                 | 0.99                 | 8.53                 | 6.47                 |
| 132                                     | 7.39                                            | 8.26                 | 0.53                 | 0.94                 | 8.58                 | 5.38                 |
| 142                                     | 3.34                                            | 8.56                 | 0.54                 | 0.96                 | 8.08                 | 12.38                |
| 152                                     | 6.49                                            | 7.31                 | 0.42                 | 0.75                 | 8.55                 | 12.34                |
| 162                                     | 4.88                                            | 7.72                 | 0.41                 | 0.73                 | 9.20                 | 7.09                 |
| 172                                     | 0.13                                            | 8.28                 | 0.56                 | 0.99                 | 8.57                 | 5.89                 |
| 182                                     | 4.46                                            | 8.31                 | 0.52                 | 0.92                 | 9.53                 | 5.62                 |
| 192                                     | 0.76                                            | 8.01                 | 0.43                 | 0.75                 | 9.40                 | 14.25                |
| 202                                     | 1.25                                            | 8.21                 | 0.51                 | 0.89                 | 10.33                | 5.46                 |
| 212                                     | 1.31                                            | 8.56                 | 0.55                 | 0.96                 | 9.78                 | 22.33                |
| 222                                     | 1.86                                            | 7.91                 | 0.45                 | 0.79                 | 9.91                 | 9.28                 |
| 232                                     | 0.27                                            | 8.34                 | 0.35                 | 0.62                 | 9.88                 | 4.24                 |
| 242                                     | 9.54                                            | 8.07                 | 0.34                 | 0.59                 | 10.65                | 3.73                 |
| 252                                     | 1.83                                            | 8.74                 | 0.45                 | 0.79                 | 10.09                | 13.20                |
| 262                                     | 2.16                                            | 8.37                 | 0.37                 | 0.65                 | 10.19                | 4.37                 |
| 272                                     | 4.61                                            | 8.67                 | 0.63                 | 1.11                 | 11.70                | 5.12                 |
| 282                                     | 9.35                                            | 8.65                 | 0.39                 | 0.68                 | 11.86                | 12.94                |
| 292                                     | 7.62                                            | 8.85                 | 0.43                 | 0.76                 | 9.84                 | 13.81                |
| 302                                     | 7.07                                            | 8.81                 | 0.50                 | 0.87                 | 10.13                | 9.14                 |
| <b>%CV<sub>mean</sub><br/>(0-300 s)</b> | 4.04                                            | 8.25                 | 0.56                 | 1.00                 | 8.56                 | 7.67                 |

**Table S3.1** Coefficient of variation (%CV) for Absorbance values at 280 nm vs [Cl<sub>2</sub>] and time from Figure 3B

| Time (s)                                | [Cl <sub>2</sub> ] mg L <sup>-1</sup> in tap water |                      |                      |                      |                      |                      |
|-----------------------------------------|----------------------------------------------------|----------------------|----------------------|----------------------|----------------------|----------------------|
|                                         | 0.00                                               | 1.00                 | 2.00                 | 3.00                 | 4.00                 | 5.00                 |
|                                         | %CV <sub>280nm</sub>                               | %CV <sub>280nm</sub> | %CV <sub>280nm</sub> | %CV <sub>280nm</sub> | %CV <sub>280nm</sub> | %CV <sub>280nm</sub> |
| 0                                       | 0.29                                               | 2.02                 | 5.03                 | 1.27                 | 5.85                 | 2.87                 |
| 12                                      | 0.47                                               | 1.95                 | 4.98                 | 1.02                 | 6.48                 | 3.29                 |
| 22                                      | 0.25                                               | 2.00                 | 5.06                 | 0.70                 | 6.14                 | 2.46                 |
| 32                                      | 0.21                                               | 1.98                 | 5.06                 | 1.29                 | 5.47                 | 2.30                 |
| 42                                      | 0.19                                               | 1.93                 | 5.11                 | 1.55                 | 6.38                 | 0.82                 |
| 52                                      | 0.21                                               | 1.98                 | 5.15                 | 1.56                 | 6.13                 | 1.97                 |
| 62                                      | 0.21                                               | 1.96                 | 5.35                 | 1.62                 | 5.88                 | 2.14                 |
| 72                                      | 0.18                                               | 1.92                 | 5.50                 | 1.52                 | 5.86                 | 1.77                 |
| 82                                      | 0.15                                               | 1.92                 | 5.44                 | 2.01                 | 6.00                 | 3.76                 |
| 92                                      | 0.15                                               | 1.91                 | 5.19                 | 1.71                 | 5.82                 | 1.90                 |
| 102                                     | 0.17                                               | 1.88                 | 5.14                 | 1.72                 | 5.82                 | 1.50                 |
| 112                                     | 0.15                                               | 1.85                 | 5.43                 | 1.87                 | 6.12                 | 1.70                 |
| 122                                     | 0.16                                               | 1.86                 | 5.39                 | 1.89                 | 5.45                 | 1.28                 |
| 132                                     | 0.16                                               | 1.86                 | 5.46                 | 1.71                 | 5.78                 | 1.63                 |
| 142                                     | 0.15                                               | 1.82                 | 5.44                 | 1.67                 | 6.00                 | 1.75                 |
| 152                                     | 0.14                                               | 1.85                 | 5.50                 | 1.69                 | 5.65                 | 1.02                 |
| 162                                     | 0.14                                               | 1.89                 | 5.57                 | 1.89                 | 5.97                 | 1.60                 |
| 172                                     | 0.16                                               | 1.88                 | 5.52                 | 1.60                 | 5.85                 | 1.62                 |
| 182                                     | 0.18                                               | 1.92                 | 5.56                 | 1.78                 | 5.72                 | 1.51                 |
| 192                                     | 0.20                                               | 1.94                 | 5.58                 | 0.62                 | 6.10                 | 1.33                 |
| 202                                     | 0.20                                               | 1.93                 | 5.62                 | 1.62                 | 6.45                 | 1.47                 |
| 212                                     | 0.19                                               | 1.95                 | 5.62                 | 1.40                 | 6.10                 | 1.69                 |
| 222                                     | 0.19                                               | 1.94                 | 5.67                 | 1.60                 | 5.99                 | 1.66                 |
| 232                                     | 0.15                                               | 1.95                 | 5.90                 | 1.55                 | 5.83                 | 1.62                 |
| 242                                     | 0.17                                               | 1.94                 | 6.23                 | 1.44                 | 5.91                 | 1.03                 |
| 252                                     | 0.17                                               | 1.94                 | 6.29                 | 1.60                 | 6.15                 | 1.99                 |
| 262                                     | 0.18                                               | 1.97                 | 5.84                 | 1.65                 | 6.06                 | 1.90                 |
| 272                                     | 0.17                                               | 1.97                 | 5.80                 | 1.67                 | 6.06                 | 2.05                 |
| 282                                     | 0.12                                               | 1.97                 | 5.80                 | 1.61                 | 5.82                 | 1.70                 |
| 292                                     | 0.10                                               | 1.96                 | 5.82                 | 1.51                 | 5.76                 | 1.59                 |
| 302                                     | 0.07                                               | 2.30                 | 5.85                 | 1.46                 | 5.88                 | 1.37                 |
| <b>%CV<sub>mean</sub><br/>(0-300 s)</b> | 0.18                                               | 1.94                 | 5.51                 | 1.54                 | 5.95                 | 1.82                 |

**Table S3.2** Coefficient of variation (%CV) for Absorbance values at 450 nm vs [Cl<sub>2</sub>] and time from Figure 3B

| Time (s)                                | [Cl <sub>2</sub> ] mg L <sup>-1</sup> in tap water |                      |                      |                      |                      |                      |
|-----------------------------------------|----------------------------------------------------|----------------------|----------------------|----------------------|----------------------|----------------------|
|                                         | 0.00                                               | 1.00                 | 2.00                 | 3.00                 | 4.00                 | 5.00                 |
|                                         | %CV <sub>450nm</sub>                               | %CV <sub>450nm</sub> | %CV <sub>450nm</sub> | %CV <sub>450nm</sub> | %CV <sub>450nm</sub> | %CV <sub>450nm</sub> |
| 0                                       | 8.25                                               | 4.16                 | 0.69                 | 2.51                 | 3.15                 | 0.60                 |
| 12                                      | 3.21                                               | 3.79                 | 0.81                 | 2.32                 | 3.45                 | 2.70                 |
| 22                                      | 6.49                                               | 3.99                 | 1.17                 | 2.29                 | 3.55                 | 2.82                 |
| 32                                      | 1.91                                               | 4.07                 | 1.22                 | 2.16                 | 3.61                 | 2.91                 |
| 42                                      | 3.82                                               | 4.46                 | 1.24                 | 2.10                 | 3.71                 | 2.99                 |
| 52                                      | 5.89                                               | 3.79                 | 1.40                 | 2.06                 | 3.71                 | 3.03                 |
| 62                                      | 5.10                                               | 4.27                 | 1.25                 | 2.02                 | 3.76                 | 3.07                 |
| 72                                      | 4.52                                               | 4.32                 | 0.92                 | 2.00                 | 3.76                 | 3.06                 |
| 82                                      | 3.86                                               | 4.29                 | 1.31                 | 1.94                 | 3.76                 | 3.09                 |
| 92                                      | 3.90                                               | 4.63                 | 1.70                 | 1.98                 | 3.81                 | 3.11                 |
| 102                                     | 6.51                                               | 4.58                 | 1.84                 | 1.96                 | 3.80                 | 3.11                 |
| 112                                     | 6.10                                               | 4.44                 | 1.62                 | 1.92                 | 3.81                 | 3.13                 |
| 122                                     | 4.02                                               | 4.31                 | 1.67                 | 1.86                 | 3.75                 | 3.09                 |
| 132                                     | 4.68                                               | 4.71                 | 1.64                 | 1.86                 | 3.80                 | 3.14                 |
| 142                                     | 1.94                                               | 4.74                 | 1.64                 | 1.84                 | 3.81                 | 3.16                 |
| 152                                     | 6.13                                               | 4.22                 | 1.62                 | 1.83                 | 3.79                 | 3.15                 |
| 162                                     | 3.78                                               | 4.62                 | 1.59                 | 1.80                 | 3.79                 | 3.15                 |
| 172                                     | 3.39                                               | 4.29                 | 1.66                 | 1.79                 | 3.81                 | 3.18                 |
| 182                                     | 7.29                                               | 4.17                 | 1.58                 | 1.80                 | 3.76                 | 3.15                 |
| 192                                     | 9.22                                               | 4.27                 | 1.60                 | 1.88                 | 3.77                 | 3.16                 |
| 202                                     | 11.42                                              | 4.10                 | 1.60                 | 1.83                 | 3.80                 | 3.18                 |
| 212                                     | 10.72                                              | 4.02                 | 1.58                 | 1.78                 | 3.80                 | 3.18                 |
| 222                                     | 11.02                                              | 4.07                 | 1.54                 | 1.78                 | 3.76                 | 3.16                 |
| 232                                     | 8.50                                               | 3.96                 | 1.31                 | 1.79                 | 3.79                 | 3.19                 |
| 242                                     | 10.41                                              | 4.22                 | 0.85                 | 1.78                 | 3.77                 | 3.18                 |
| 252                                     | 7.94                                               | 3.79                 | 0.85                 | 1.77                 | 3.80                 | 3.20                 |
| 262                                     | 10.16                                              | 3.80                 | 1.33                 | 1.77                 | 3.79                 | 3.21                 |
| 272                                     | 10.55                                              | 3.68                 | 1.37                 | 1.75                 | 3.76                 | 3.18                 |
| 282                                     | 6.57                                               | 3.62                 | 1.35                 | 1.73                 | 3.75                 | 3.17                 |
| 292                                     | 1.13                                               | 3.85                 | 1.33                 | 1.74                 | 3.76                 | 3.19                 |
| 302                                     | 5.13                                               | 1.98                 | 1.25                 | 1.74                 | 3.75                 | 3.19                 |
| <b>%CV<sub>mean</sub><br/>(0-300 s)</b> | 6.24                                               | 4.10                 | 1.37                 | 1.92                 | 3.73                 | 3.03                 |



**Table S3.3** Coefficient of variation (%CV) for Absorbance values at 655 nm vs [Cl<sub>2</sub>] and time from Figure 3B

| Time (s)                                | [Cl <sub>2</sub> ] mg L <sup>-1</sup> in tap water |                      |                      |                      |                      |                      |
|-----------------------------------------|----------------------------------------------------|----------------------|----------------------|----------------------|----------------------|----------------------|
|                                         | 0.00                                               | 1.00                 | 2.00                 | 3.00                 | 4.00                 | 5.00                 |
|                                         | %CV <sub>655nm</sub>                               | %CV <sub>655nm</sub> | %CV <sub>655nm</sub> | %CV <sub>655nm</sub> | %CV <sub>655nm</sub> | %CV <sub>655nm</sub> |
| 0                                       | 1.06                                               | 4.72                 | 2.69                 | 0.05                 | 1.39                 | 0.30                 |
| 12                                      | 14.64                                              | 4.70                 | 2.9                  | 0.46                 | 2.12                 | 1.84                 |
| 22                                      | 2.25                                               | 4.83                 | 2.97                 | 0.46                 | 2.46                 | 0.34                 |
| 32                                      | 2.52                                               | 4.40                 | 3.19                 | 0.50                 | 2.66                 | 0.35                 |
| 42                                      | 3.67                                               | 4.64                 | 3.22                 | 0.39                 | 2.51                 | 0.48                 |
| 52                                      | 9.04                                               | 4.64                 | 3.23                 | 0.48                 | 2.67                 | 1.32                 |
| 62                                      | 6.84                                               | 4.70                 | 3.37                 | 0.56                 | 2.66                 | 0.97                 |
| 72                                      | 5.11                                               | 4.80                 | 3.71                 | 0.57                 | 2.69                 | 0.70                 |
| 82                                      | 15.28                                              | 4.70                 | 3.47                 | 0.72                 | 3.16                 | 2.03                 |
| 92                                      | 6.23                                               | 4.73                 | 3.32                 | 0.71                 | 2.80                 | 0.95                 |
| 102                                     | 4.37                                               | 4.80                 | 3.50                 | 0.71                 | 3.21                 | 0.61                 |
| 112                                     | 3.24                                               | 4.40                 | 3.35                 | 0.81                 | 3.01                 | 0.43                 |
| 122                                     | 6.75                                               | 4.80                 | 3.59                 | 0.68                 | 3.02                 | 1.03                 |
| 132                                     | 11.36                                              | 4.73                 | 3.58                 | 0.80                 | 2.99                 | 1.60                 |
| 142                                     | 5.36                                               | 4.89                 | 3.79                 | 0.89                 | 2.76                 | 0.81                 |
| 152                                     | 10.8                                               | 4.58                 | 3.70                 | 0.68                 | 2.91                 | 1.55                 |
| 162                                     | 8.42                                               | 4.79                 | 3.73                 | 0.73                 | 2.96                 | 1.15                 |
| 172                                     | 0.23                                               | 4.78                 | 3.61                 | 1.01                 | 2.71                 | 0.03                 |
| 182                                     | 6.97                                               | 4.40                 | 3.70                 | 0.89                 | 2.72                 | 1.01                 |
| 192                                     | 1.31                                               | 4.32                 | 3.70                 | 1.10                 | 2.88                 | 0.17                 |
| 202                                     | 2.31                                               | 4.71                 | 3.64                 | 1.35                 | 2.63                 | 0.3                  |
| 212                                     | 2.23                                               | 4.61                 | 3.73                 | 1.09                 | 2.56                 | 0.31                 |
| 222                                     | 3.1                                                | 4.66                 | 3.86                 | 1.35                 | 2.73                 | 0.44                 |
| 232                                     | 0.49                                               | 4.52                 | 3.92                 | 1.11                 | 2.85                 | 0.06                 |
| 242                                     | 1.75                                               | 4.73                 | 4.38                 | 1.24                 | 2.36                 | 2.26                 |
| 252                                     | 3.57                                               | 4.69                 | 4.27                 | 1.39                 | 2.83                 | 0.44                 |
| 262                                     | 4.13                                               | 4.69                 | 4.00                 | 1.25                 | 2.80                 | 0.51                 |
| 272                                     | 8.32                                               | 4.60                 | 3.92                 | 1.26                 | 2.85                 | 1.11                 |
| 282                                     | 8.87                                               | 4.68                 | 4.03                 | 1.34                 | 2.70                 | 2.19                 |
| 292                                     | 14.26                                              | 4.57                 | 4.01                 | 1.32                 | 2.80                 | 1.89                 |
| 302                                     | 11.03                                              | 4.28                 | 2.69                 | 1.31                 | 2.86                 | 1.58                 |
| <b>%CV<sub>mean</sub><br/>(0-300 s)</b> | 5.98                                               | 4.65                 | 3.57                 | 0.88                 | 2.72                 | 0.93                 |

**Table S4.1** Coefficient of variation (%CV) for DPD Absorbance values at 555 nm vs  $[\text{Cl}_2]$  and time from Figure 4C ( $\text{H}_2\text{O}$ )

|                                                     | <b>0 s</b>                 | <b>30 s</b>                | <b>60 s</b>                | <b>120 s</b>               | <b>240 s</b>               |
|-----------------------------------------------------|----------------------------|----------------------------|----------------------------|----------------------------|----------------------------|
| <b><math>[\text{Cl}_2]</math> mg L<sup>-1</sup></b> | <b>%CV<sub>555nm</sub></b> | <b>%CV<sub>555nm</sub></b> | <b>%CV<sub>555nm</sub></b> | <b>%CV<sub>555nm</sub></b> | <b>%CV<sub>555nm</sub></b> |
| 0.00                                                | 5.89                       | 5.76                       | 4.91                       | 4.56                       | 4.61                       |
| 0.25                                                | 11.04                      | 14.74                      | 15.40                      | 15.85                      | 13.59                      |
| 0.50                                                | 18.40                      | 17.26                      | 17.23                      | 16.20                      | 15.86                      |
| 1.00                                                | 11.11                      | 8.09                       | 6.75                       | 4.73                       | 3.55                       |
| 1.50                                                | 10.90                      | 10.45                      | 8.99                       | 7.21                       | 6.43                       |
| 2.00                                                | 8.86                       | 7.18                       | 4.57                       | 2.68                       | 3.27                       |
| 2.50                                                | 8.19                       | 6.43                       | 5.03                       | 4.54                       | 4.86                       |
| 3.00                                                | 2.57                       | 2.63                       | 2.67                       | 2.70                       | 3.05                       |
| 3.50                                                | 6.20                       | 6.03                       | 5.81                       | 5.43                       | 4.65                       |
| 4.00                                                | 3.92                       | 2.41                       | 1.64                       | 1.07                       | 1.46                       |
| 4.50                                                | 5.68                       | 4.38                       | 4.21                       | 3.44                       | 4.44                       |
| 5.00                                                | 3.60                       | 2.83                       | 1.57                       | 2.11                       | 2.77                       |
| <b>%CV<sub>mean</sub></b>                           | 8.03                       | 7.35                       | 6.57                       | 5.88                       | 5.71                       |

**Table S4.2** Coefficient of variation (%CV) for DPD Absorbance values at 555 nm vs  $[\text{Cl}_2]$  and time from Figure 4D (Tap water)

|                                                     | <b>0 s</b>                 | <b>30 s</b>                | <b>60 s</b>                | <b>120 s</b>               | <b>240 s</b>               |
|-----------------------------------------------------|----------------------------|----------------------------|----------------------------|----------------------------|----------------------------|
| <b><math>[\text{Cl}_2]</math> mg L<sup>-1</sup></b> | <b>%CV<sub>555nm</sub></b> | <b>%CV<sub>555nm</sub></b> | <b>%CV<sub>555nm</sub></b> | <b>%CV<sub>555nm</sub></b> | <b>%CV<sub>555nm</sub></b> |
| 0.00                                                | 11.82                      | 10.26                      | 10.21                      | 9.68                       | 8.48                       |
| 0.25                                                | 9.16                       | 8.96                       | 8.20                       | 7.80                       | 6.94                       |
| 0.50                                                | 11.82                      | 10.26                      | 10.21                      | 9.68                       | 8.48                       |
| 1.00                                                | 9.16                       | 8.96                       | 8.20                       | 7.80                       | 6.94                       |
| 1.50                                                | 11.82                      | 10.26                      | 10.21                      | 9.68                       | 8.48                       |
| 2.00                                                | 9.16                       | 8.96                       | 8.20                       | 7.80                       | 6.94                       |
| 2.50                                                | 11.82                      | 10.26                      | 10.21                      | 9.68                       | 8.48                       |
| 3.00                                                | 9.16                       | 8.96                       | 8.20                       | 7.80                       | 6.94                       |
| 3.50                                                | 11.82                      | 10.26                      | 10.21                      | 9.68                       | 8.48                       |
| 4.00                                                | 9.16                       | 8.96                       | 8.20                       | 7.80                       | 6.94                       |
| 4.50                                                | 11.82                      | 10.26                      | 10.21                      | 9.68                       | 8.48                       |
| 5.00                                                | 9.16                       | 8.96                       | 8.20                       | 7.80                       | 6.94                       |
| <b>%CV<sub>mean</sub></b>                           | 9.16                       | 8.96                       | 8.20                       | 7.80                       | 6.94                       |

**Table S4.3** Coefficient of variation (%CV) for TMB Absorbance values at 450 nm vs [Cl<sub>2</sub>] and time from Figure 4C (H<sub>2</sub>O)

|                                       | 0 s                  | 30 s                 | 60 s                 | 120 s                | 240 s                |
|---------------------------------------|----------------------|----------------------|----------------------|----------------------|----------------------|
| [Cl <sub>2</sub> ] mg L <sup>-1</sup> | %CV <sub>450nm</sub> |
| 0.00                                  | 5.29                 | 3.82                 | 5.14                 | 3.83                 | 2.94                 |
| 0.25                                  | 17.91                | 23.43                | 3.46                 | 4.10                 | 4.34                 |
| 0.50                                  | 6.05                 | 11.39                | 1.55                 | 18.36                | 16.04                |
| 1.00                                  | 10.66                | 6.49                 | 6.85                 | 6.58                 | 7.08                 |
| 1.50                                  | 0.48                 | 1.54                 | 2.35                 | 2.95                 | 4.19                 |
| 2.00                                  | 0.81                 | 1.23                 | 1.62                 | 1.74                 | 2.01                 |
| 2.50                                  | 1.28                 | 1.42                 | 1.31                 | 1.39                 | 1.51                 |
| 3.00                                  | 1.25                 | 1.18                 | 1.44                 | 1.40                 | 1.56                 |
| 3.50                                  | 0.93                 | 0.98                 | 0.98                 | 1.06                 | 1.02                 |
| 4.00                                  | 0.97                 | 0.82                 | 0.78                 | 0.86                 | 0.91                 |
| 4.50                                  | 1.81                 | 1.63                 | 1.40                 | 1.68                 | 1.99                 |
| 5.00                                  | 0.66                 | 1.05                 | 1.40                 | 1.30                 | 2.23                 |
| <b>%CV<sub>mean</sub></b>             | 4.01                 | 4.58                 | 2.36                 | 3.77                 | 3.82                 |

**Table S4.4** Coefficient of variation (%CV) for TMB Absorbance values at 450 nm vs [Cl<sub>2</sub>] and time from Figure 4D (Tap water)

|                                       | 0 s                  | 30 s                 | 60 s                 | 120 s                | 240 s                |
|---------------------------------------|----------------------|----------------------|----------------------|----------------------|----------------------|
| [Cl <sub>2</sub> ] mg L <sup>-1</sup> | %CV <sub>450nm</sub> |
| 0.00                                  | 1.38                 | 1.15                 | 0.39                 | 0.53                 | 0.56                 |
| 0.25                                  | 0.64                 | 0.33                 | 0.90                 | 1.13                 | 0.94                 |
| 0.50                                  | 2.44                 | 2.16                 | 1.60                 | 1.49                 | 2.40                 |
| 1.00                                  | 1.38                 | 0.84                 | 1.11                 | 1.24                 | 1.35                 |
| 1.50                                  | 0.75                 | 0.85                 | 0.75                 | 0.78                 | 0.83                 |
| 2.00                                  | 7.62                 | 1.11                 | 8.14                 | 8.09                 | 8.20                 |
| 2.50                                  | 2.21                 | 0.12                 | 1.56                 | 1.59                 | 1.82                 |
| 3.00                                  | 3.77                 | 2.74                 | 3.56                 | 4.11                 | 4.78                 |
| 3.50                                  | 9.43                 | 3.80                 | 6.20                 | 6.02                 | 7.04                 |
| 4.00                                  | 9.79                 | 3.45                 | 10.71                | 12.32                | 15.20                |
| 4.50                                  | 17.48                | 12.41                | 17.16                | 17.82                | 3.64                 |
| 5.00                                  | 7.64                 | 3.06                 | 3.02                 | 3.79                 | 3.85                 |
| <b>%CV<sub>mean</sub></b>             | 5.38                 | 2.67                 | 4.59                 | 4.91                 | 4.22                 |

**Table S4.5** Coefficient of variation (%CV) for TMB Absorbance values at 655 nm vs [Cl<sub>2</sub>] and time from Figure 4C (H<sub>2</sub>O)

|                                       | 0 s                  | 30 s                 | 60 s                 | 120 s                | 240 s                |
|---------------------------------------|----------------------|----------------------|----------------------|----------------------|----------------------|
| [Cl <sub>2</sub> ] mg L <sup>-1</sup> | %CV <sub>655nm</sub> |
| 0.00                                  | 10.26                | 16.75                | 13.96                | 12.73                | 3.48                 |
| 0.25                                  | 4.88                 | 10.78                | 3.21                 | 17.86                | 16.91                |
| 0.50                                  | 18.02                | 18.86                | 14.49                | 19.57                | 20.56                |
| 1.00                                  | 16.61                | 15.06                | 15.16                | 14.3                 | 13.71                |
| 1.50                                  | 13.10                | 14.26                | 13.57                | 15.47                | 14.69                |
| 2.00                                  | 4.58                 | 4.54                 | 3.68                 | 3.34                 | 3.32                 |
| 2.50                                  | 1.83                 | 1.38                 | 2.18                 | 2.59                 | 2.50                 |
| 3.00                                  | 0.71                 | 1.78                 | 1.90                 | 2.80                 | 2.70                 |
| 3.50                                  | 2.66                 | 2.42                 | 2.42                 | 2.52                 | 2.61                 |
| 4.00                                  | 4.07                 | 5.50                 | 8.04                 | 9.06                 | 7.66                 |
| 4.50                                  | 1.11                 | 1.14                 | 2.25                 | 1.14                 | 1.14                 |
| 5.00                                  | 5.41                 | 9.76                 | 3.92                 | 3.62                 | 2.60                 |
| <b>%CV<sub>mean</sub></b>             | 6.94                 | 8.52                 | 7.07                 | 8.75                 | 7.66                 |

**Table S4.6** Coefficient of variation (%CV) for TMB Absorbance values at 655 nm vs [Cl<sub>2</sub>] and time from Figure 4D (Tap water)

|                                       | 0 s                  | 30 s                 | 60 s                 | 120 s                | 240 s                |
|---------------------------------------|----------------------|----------------------|----------------------|----------------------|----------------------|
| [Cl <sub>2</sub> ] mg L <sup>-1</sup> | %CV <sub>655nm</sub> |
| 0.00                                  | 2.56                 | 2.64                 | 2.83                 | 4.14                 | 3.56                 |
| 0.25                                  | 6.54                 | 7.70                 | 8.87                 | 8.45                 | 10.79                |
| 0.50                                  | 1.78                 | 2.73                 | 4.63                 | 5.15                 | 6.84                 |
| 1.00                                  | 1.57                 | 2.16                 | 2.16                 | 2.41                 | 2.96                 |
| 1.50                                  | 2.53                 | 2.28                 | 3.38                 | 3.75                 | 4.35                 |
| 2.00                                  | 1.45                 | 1.29                 | 2.18                 | 2.6                  | 2.54                 |
| 2.50                                  | 11.96                | 6.26                 | 11.13                | 10.03                | 9.09                 |
| 3.00                                  | 8.25                 | 3.92                 | 2.83                 | 0.73                 | 2.91                 |
| 3.50                                  | 9.59                 | 9.11                 | 16.33                | 13.03                | 10.94                |
| 4.00                                  | 29.21                | 3.20                 | 2.34                 | 2.14                 | 2.63                 |
| 4.50                                  | 2.92                 | 13.00                | 12.7                 | 10.2                 | 7.62                 |
| 5.00                                  | 17.93                | 16.88                | 15.95                | 17.11                | 16.11                |
| <b>%CV<sub>mean</sub></b>             | 8.02                 | 5.93                 | 7.11                 | 6.65                 | 6.70                 |
